# Supplementary material for: A Creative and Movement-Based Blended Intervention for Children in Outpatient Residential Care: A Mixed-Method, Multi-Center, Single-Arm Feasibility Trial
Source: MDPI journal article supplement (doi:10.3390/children10020207), 2023-01-24
Supplement: s1 [file s1]

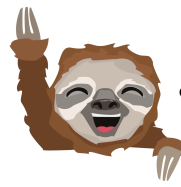

& Action, Datum: \_\_\_\_\_  
Dein Code: \_\_\_\_\_

## Prä-Testung der Kinder

Hallo,

bevor ihr Teil unseres Projektes & Action werdet, möchten wir euch zuerst etwas besser kennenlernen. Dafür haben wir einige Fragen vorbereitet. Die Fragen sind entweder zum Ankreuzen oder zum selbst beantworten. Dazu haben wir unter diesen Frage etwas Platz gelassen, damit ihr eure Antworten dort aufschreiben könnt. Lasst euch soviel Zeit, wie ihr braucht. Falls ihr Fragen habt, sprecht uns gerne an und wir helfen euch! Solltet ihr bei einer Frage auch mit unserer Hilfe auf keine Antwort kommen, dann lasst die Frage einfach frei und macht mit der Nächsten weiter!

Bitte beantworte die Fragen ehrlich. Keine Angst! Die Antworten sind alle anonym, das heißt, wir wissen nicht, wer sie beantwortet hat.

Viel Spaß bei der Beantwortung der Fragen!

Euer Team von &Action

### I. Angaben zum Kind/ Jugendlichen

#### Frage 1: Wie alt bist du?

Schreibe hier dein Alter hin: \_\_\_\_\_

#### Frage 2: Welches Geschlecht hast du? Bitte ankreuzen.

|                          |                                   |
|--------------------------|-----------------------------------|
| <input type="checkbox"/> | Weiblich                          |
| <input type="checkbox"/> | Männlich                          |
| <input type="checkbox"/> | Anderes (z.B. nicht-binär): _____ |

#### Frage 3: Welches der folgenden Hobbys hast du ausprobiert? Bitte ankreuzen

|                          |                       |
|--------------------------|-----------------------|
| <input type="checkbox"/> | In der Natur sein     |
| <input type="checkbox"/> | Yoga                  |
| <input type="checkbox"/> | Tanzen/Theater/Singen |
| <input type="checkbox"/> | Malen/Basteln         |



& Action, Datum: \_\_\_\_\_  
Dein Code: \_\_\_\_\_

**Frage 4: Welches der folgenden Hobbys machst du gerne? Bitte ankreuzen**

|                          |                       |
|--------------------------|-----------------------|
| <input type="checkbox"/> | In der Natur sein     |
| <input type="checkbox"/> | Yoga                  |
| <input type="checkbox"/> | Tanzen/Theater/Singen |
| <input type="checkbox"/> | Malen/Basteln         |

**II. Angaben zur Mediennutzung**

**Frage 5: Welche der nachfolgenden Geräte nutzt du am häufigsten?  
Nummeriere sie der Häufigkeit nach von 1 (am häufigsten) bis 4 (am wenigsten).**

|          |                 |
|----------|-----------------|
| Nr. ____ | Handy           |
| Nr. ____ | Computer/Laptop |
| Nr. ____ | Tablet          |
| Nr. ____ | Spielekonsole   |

**Frage 6: Wie viel Zeit verbringst du durchschnittlich pro Tag am Smartphone? Bitte ankreuzen.**

|                          |                        |
|--------------------------|------------------------|
| <input type="checkbox"/> | weniger als 30 Minuten |
| <input type="checkbox"/> | 30 - 60 Minuten        |
| <input type="checkbox"/> | 1 - 2 Stunden          |
| <input type="checkbox"/> | 3 - 4 Stunden          |
| <input type="checkbox"/> | mehr als 5 Stunden     |

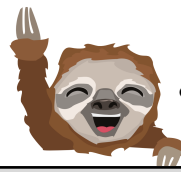

& Action, Datum: \_\_\_\_\_

Dein Code: \_\_\_\_\_

**Frage 7: Wie sicher fühlst du dich im Umgang mit Apps? Bitte ankreuzen.**

|                          |                  |
|--------------------------|------------------|
| <input type="checkbox"/> | sehr sicher      |
| <input type="checkbox"/> | sicher           |
| <input type="checkbox"/> | teilweise sicher |
| <input type="checkbox"/> | nicht sicher     |
| <input type="checkbox"/> | gar nicht sicher |

**Frage 8: Welche Apps benutzt du besonders gerne?**

|  |
|--|
|  |
|  |

**Frage 9: Wie hat sich dein Medienkonsum (= die Zeit am Laptop, Smartphone oder Tablet) seit der Pandemie verändert? Bitte ankreuzen.**

|                          |                  |
|--------------------------|------------------|
| <input type="checkbox"/> | deutlich mehr    |
| <input type="checkbox"/> | mehr             |
| <input type="checkbox"/> | gleich geblieben |
| <input type="checkbox"/> | weniger          |
| <input type="checkbox"/> | deutlich weniger |

**Frage 10: Wie findest du deine Menge an Medienkonsum? Bitte ankreuzen.**

|                          |               |
|--------------------------|---------------|
| <input type="checkbox"/> | sehr gut      |
| <input type="checkbox"/> | gut           |
| <input type="checkbox"/> | mittel        |
| <input type="checkbox"/> | schlecht      |
| <input type="checkbox"/> | sehr schlecht |

Herzlichen Dank für die Beantwortung der Fragen! Wir wünschen dir viel Spaß bei dem Projekt! Dein Team von &Action
