# Supplementary material for: A Creative and Movement-Based Blended Intervention for Children in Outpatient Residential Care: A Mixed-Method, Multi-Center, Single-Arm Feasibility Trial
Source: MDPI journal article supplement (doi:10.3390/children10020207), 2023-01-24
Supplement: s1 [file s1]

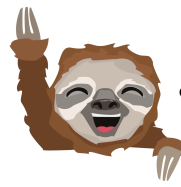

& Action, Datum: \_\_\_\_\_  
Dein Code: \_\_\_\_\_

**Interviewleitfaden & Action ist ein Projekt der YIN YOUNG & YOU gUG**

(haftungsbeschränkt) Ausgründung der Freien Universität Berlin

**Projektlaufzeit: 01.01.2022 - 31.08.2022**

YIN YOUNG & YOU

Mondori App

**Titel der Studie: & Action! The effectiveness of a creative blended care  
intervention for children in residential care: Results of a single arm, multicenter  
pilot study**

**Post Testung der Mitglieder der Institution**

Susanne Birnkammer, Wissenschaftliche Mitarbeiterin am Fachbereich  
Erziehungswissenschaften und Psychologie, Arbeitsbereich Klinische Kinder- und  
Jugendpsychologie und -psychotherapie, Habelschwerdter Allee 45, 14195 Berlin,  
E-Mail: [susanne.birnkammer@fu-berlin.de](mailto:susanne.birnkammer@fu-berlin.de)

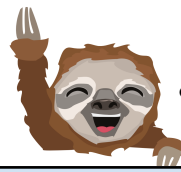

& Action, Datum: \_\_\_\_\_  
Dein Code: \_\_\_\_\_

## I. Einleitung Post- Testung der Mitglieder

### → Gesprächsbeginn:

Liebe Mitglieder der Institution,  
wir hoffen, unser Projekt in Ihrer Einrichtung hat Ihnen gefallen! Als nächstes möchten wir Ihnen einige Fragen diesbezüglich stellen. Falls Sie Fragen oder Anmerkungen haben, können Sie diese gerne im Nachgang stellen. Ihr Feedback hilft uns bei der Verbesserung der App/des Programms, weswegen wir Sie bitten, die Fragen so ausführlich wie möglich zu beantworten. Wir teilen die Fragen auf in Fragen zur App Mondori, der Präsenzübungen sowie dem Projekt im Ganzen.  
Beginnen wir mit der ersten Frage.

## II. Angaben zur App

### → Um die App besser zu gestalten, hätten wir jetzt noch einige Fragen an Sie.

**Frage 1: Was fanden Sie an der Mondori App besonders gut/effektiv?**

|  |
|--|
|  |
|  |
|  |

### → Danke für dein Feedback zu der App.

**Frage 2: Was hat Ihnen an der Mondori App nicht gefallen?**

|  |
|--|
|  |
|  |
|  |

### → Vielen Dank.

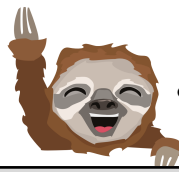

& Action, Datum: \_\_\_\_\_

Dein Code: \_\_\_\_\_

**Frage 3: Welche Schulnote würden Sie der App vergeben?**

|  |
|--|
|  |
|--|

**Frage 4: Wie häufig wurde die App von den Kindern/Jugendlichen verwendet?**

|  |
|--|
|  |
|  |
|  |

**Frage 5: Was denken Sie, wie die App den Kindern/Jugendlichen gefallen hat?**

|  |
|--|
|  |
|  |
|  |

**Frage 6: Welchen Eindruck haben Sie, bezüglich der Weiternutzung der App bei den Kindern/Jugendlichen?**

|  |
|--|
|  |
|  |
|  |

**Frage 7: Wie hat Ihnen das Design der App gefallen? Kreuzen Sie an.**

|   |                                     |
|---|-------------------------------------|
|   |                                     |
|   |                                     |
| a | Mir hat es überhaupt nicht gefallen |
| b | Mir hat es nicht so gut gefallen    |
| c | Ich fand es weder gut noch schlecht |
| d | Mir hat es gut gefallen             |
| e | Mir hat es sehr gut gefallen        |

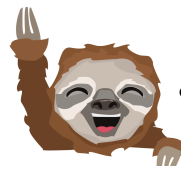

& Action, Datum: \_\_\_\_\_  
Dein Code: \_\_\_\_\_

**Frage 8: Wie würden Sie insgesamt Ihre Erfahrung mit dem &Action Programm und der Mondori App bewerten? Kreuzen Sie an.**

*Notizen:*

- |   |                                     |
|---|-------------------------------------|
| a | Mir hat es überhaupt nicht gefallen |
| b | Mir hat es nicht so gut gefallen    |
| c | Ich fand es weder gut noch schlecht |
| d | Mir hat beides gut gefallen         |
| e | Mir hat beides sehr gut gefallen    |

**Frage 9: Würden Sie unsere App Mondori anderen weiterempfehlen? Kreuzen Sie an.**

- |   |                                                                |
|---|----------------------------------------------------------------|
| a | Ja, ich würde die Mondori App anderen weiterempfehlen!         |
| b | Nein, ich würde die Mondori App anderen nicht weiterempfehlen! |

→ Wenn nein, warum würden Sie die App nicht weiter empfehlen?

(Notizen):

---

---

---

III. Angaben zu Präsenzübungen

→ Jetzt möchten wir Ihnen noch einige Fragen zu den therapeutischen Übungen vor Ort stellen

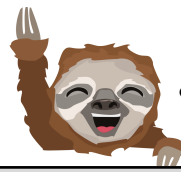

& Action, Datum: \_\_\_\_\_  
Dein Code: \_\_\_\_\_

**Frage 10: Welche Therapieart, denken Sie, hat den Kindern/Jugendlichen am meisten Spaß gemacht?**

|  |
|--|
|  |
|  |
|  |

**Frage 11: Welche Therapieart, denken Sie, waren für die Kinder/ Jugendlichen schwieriger zu bewältigen? Falls ja, durch welche Barrieren gekennzeichnet?**

|  |
|--|
|  |
|  |
|  |

**Frage 12: Welche Therapieart, denken Sie, waren für die Kinder/ Jugendlichen schwieriger zu bewältigen? Falls ja, durch welche Barrieren gekennzeichnet?**

|  |
|--|
|  |
|  |
|  |
|  |

#### IV. Angaben zum Projekt

**Frage 13: Hättest du dir eine längere Laufzeit des Projektes (App mit 12 Inseln, Präsenzübungen) gewünscht? (12 Wochen)? Kreuzen Sie an.**

|                          |                                               |
|--------------------------|-----------------------------------------------|
| <input type="checkbox"/> | Ja                                            |
| <input type="checkbox"/> | Nein                                          |
| <input type="checkbox"/> | Vielleicht, wenn folgendes anders wäre: _____ |



& Action, Datum: \_\_\_\_\_

Dein Code: \_\_\_\_\_

**Frage 14: Was hat Ihnen generell an das Projekt gefallen?**

|  |
|--|
|  |
|  |
|  |

**Frage 15: Welches der beiden Angebote, hat Ihnen besser gefallen? Kreuzen Sie an.**

|                          |                  |
|--------------------------|------------------|
| <input type="checkbox"/> | Präsenzübung     |
| <input type="checkbox"/> | Mondori App      |
| <input type="checkbox"/> | Falls ja, warum? |
| <input type="checkbox"/> |                  |

→ Falls Sie weitere Anmerkungen haben, freuen wir uns sehr! Entweder schreiben Sie diese direkt hier auf oder Sie erreichen uns auch jederzeit unter der Email Adresse

[info@ying-young-you.com](mailto:info@ying-young-you.com)!

Anmerkungen/Fragen der interviewten Person:

|  |
|--|
|  |
|  |
|  |
|  |

**V. Gesprächsabschluss**

→ Damit wären wir am Ende unseres Interviews. Wir bedanken uns herzlichst für die Beantwortung der Fragen und die Testung unserer App Mondori zusammen mit den Kindern/Jugendlichen! Wir freuen uns, wenn Sie Mondori auch zukünftig verwenden!

Ihr Team von &Action
