# Supplementary material for: A Creative and Movement-Based Blended Intervention for Children in Outpatient Residential Care: A Mixed-Method, Multi-Center, Single-Arm Feasibility Trial
Source: MDPI journal article supplement (doi:10.3390/children10020207), 2023-01-24
Supplement: s1 [file s1]

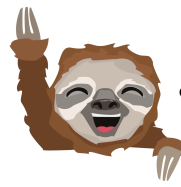

& Action, Datum: \_\_\_\_\_  
Code: \_\_\_\_\_

Liebe Mitglieder der Institutionen,

bevor wir Sie Teil des & Action Projektes werden, möchten wir gerne vorab ein paar Fragen an Sie richten, um die Kinder und Jugendlichen besser kennenzulernen. Wir stehen für Fragen jederzeit zur Verfügung. Bitte lassen Sie sich in der Beantwortung soviel Zeit, wie nötig und antworten Sie so ausführlich und ehrlich wie möglich. Die Antworten sind natürlich anonymisiert und nicht mehr auf Sie oder das Kind rückführbar.

Ihr Team von &Action

### **I. Angaben zum Kind/ Jugendlichen**

**Frage 1: Wie ist die Muttersprache des Kindes oder der/des Jugendlichen?**

|  |
|--|
|  |
|--|

**Frage 2: Hat das Kind oder der/die Jugendliche eine Leseschwäche? Kreuzen Sie an.**

|                          |    |                          |      |
|--------------------------|----|--------------------------|------|
| <input type="checkbox"/> | Ja | <input type="checkbox"/> | Nein |
|--------------------------|----|--------------------------|------|

**Frage 3: Gibt es derzeit Probleme/Krisen bei dem Kind/Jugendlichen? Kreuzen Sie an.**

|                          |    |                          |      |
|--------------------------|----|--------------------------|------|
| <input type="checkbox"/> | Ja | <input type="checkbox"/> | Nein |
|--------------------------|----|--------------------------|------|

**Falls ja, benennen Sie diese kurz...**

|  |
|--|
|  |
|  |
|  |
|  |

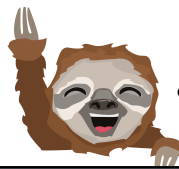

& Action, Datum: \_\_\_\_\_

Code: \_\_\_\_\_

## II. Angaben zu den Eltern/ Bezugspersonen

### Frage 4: Hat das Kind psychisch erkrankte Eltern? Kreuzen Sie an.

|                          |                              |
|--------------------------|------------------------------|
| <input type="checkbox"/> | Ja, die Mutter               |
| <input type="checkbox"/> | Ja, der Vater                |
| <input type="checkbox"/> | beide Eltern                 |
| <input type="checkbox"/> | andere Bezugspersonen: _____ |
| <input type="checkbox"/> | Nein                         |

### Frage 5: Wenn ja, welche psychischen Erkrankungen? (Mehrfachnennung möglich) Kreuzen Sie an.

|                          |                                                                                              |
|--------------------------|----------------------------------------------------------------------------------------------|
| <input type="checkbox"/> | Depression                                                                                   |
| <input type="checkbox"/> | Bipolare Störung (Episoden der Manie & Episoden der Depression)                              |
| <input type="checkbox"/> | Angststörungen (z.B. Panikstörung, Agoraphobie, Soziale Phobie, Generalisierte Angststörung) |
| <input type="checkbox"/> | Essstörungen (z.B. Magersucht, Bulimie, Binge-Eating-Störung)                                |
| <input type="checkbox"/> | Posttraumatische Belastungsstörung                                                           |
| <input type="checkbox"/> | Autismus                                                                                     |
| <input type="checkbox"/> | Aufmerksamkeits-Defizit-Hyperaktivitäts-Störung                                              |
| <input type="checkbox"/> | Zwangsstörungen (z.B. Waschzwang, Durchführen von Ritualen)                                  |
| <input type="checkbox"/> | Borderline-Persönlichkeitsstörung                                                            |
| <input type="checkbox"/> | Schizophrenie oder andere psychotische Erkrankungen                                          |
| <input type="checkbox"/> | Suchterkrankungen (z.B. Alkoholsucht, Drogensucht, Spielsucht)                               |
| <input type="checkbox"/> | Demenz                                                                                       |

### Frage 6: Hat das Kind oder der/die Jugendliche regelmäßigen Kontakt zu den Eltern? Kreuzen Sie an.

|                          |    |                          |      |
|--------------------------|----|--------------------------|------|
| <input type="checkbox"/> | Ja | <input type="checkbox"/> | Nein |
|--------------------------|----|--------------------------|------|



& Action, Datum: \_\_\_\_\_  
Code: \_\_\_\_\_

**Falls ja, wie oft steht das Kind oder der/die Jugendliche mit den Eltern in Kontakt?  
Kreuzen Sie an.**

|                          |                       |
|--------------------------|-----------------------|
| <input type="checkbox"/> | Jeden Tag             |
| <input type="checkbox"/> | Mehrmals in der Woche |
| <input type="checkbox"/> | 1x pro Woche          |
| <input type="checkbox"/> | Mehrmals im Monat     |
| <input type="checkbox"/> | 1x pro Monat          |
| <input type="checkbox"/> | Ein paar Mal im Jahr  |

**Frage 7: Wie lange ist das Kind oder der/ die Jugendliche schon in der Einrichtung?  
Kreuzen Sie an.**

|                          |                      |
|--------------------------|----------------------|
| <input type="checkbox"/> | Weniger als 1 Jahr   |
| <input type="checkbox"/> | 1 bis unter 2 Jahren |
| <input type="checkbox"/> | 2 bis unter 3 Jahren |
| <input type="checkbox"/> | 3 bis unter 6 Jahren |
| <input type="checkbox"/> | Über 6 Jahre         |

**Frage 8: Wie lange ist das Kind oder der/ die Jugendliche schon am Jugendamt  
angeschlossen? Kreuzen Sie an.**

|                          |                      |
|--------------------------|----------------------|
| <input type="checkbox"/> | Weniger als 1 Jahr   |
| <input type="checkbox"/> | 1 bis unter 2 Jahren |
| <input type="checkbox"/> | 2 bis unter 3 Jahren |
| <input type="checkbox"/> | 3 bis unter 6 Jahren |
| <input type="checkbox"/> | Über 6 Jahre         |

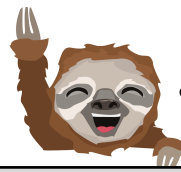

& Action, Datum: \_\_\_\_\_

Code: \_\_\_\_\_

**Frage 9: Haben die Eltern einen Migrationshintergrund? Kreuzen Sie an.**

|                          |    |                          |      |
|--------------------------|----|--------------------------|------|
| <input type="checkbox"/> | Ja | <input type="checkbox"/> | Nein |
|--------------------------|----|--------------------------|------|

**Vielen lieben Dank!**
