# Supplementary material for: A Creative and Movement-Based Blended Intervention for Children in Outpatient Residential Care: A Mixed-Method, Multi-Center, Single-Arm Feasibility Trial
Source: MDPI journal article supplement (doi:10.3390/children10020207), 2023-01-24
Supplement: s1 [file s1]

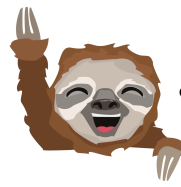

& Action, Datum: \_\_\_\_\_  
Dein Code: \_\_\_\_\_

**Interviewleitfaden & Action ist ein Projekt der YIN YOUNG & YOU gUG**  
(haftungsbeschränkt) Ausgründung der Freien Universität Berlin

**Projektlaufzeit: 01.01.2022 - 31.08.2022**

YIN YOUNG & YOU  
Mondori App

**Titel der Studie: & Action! The effectiveness of a creative blended care  
intervention for children in residential care: Results of a single arm, multicenter  
pilot study**

**Post Testung der Kinder und Jugendlichen**

Susanne Birnkammer, Wissenschaftliche Mitarbeiterin am Fachbereich  
Erziehungswissenschaften und Psychologie, Arbeitsbereich Klinische Kinder- und  
Jugendpsychologie und -psychotherapie, Habelschwerdter Allee 45, 14195 Berlin,  
E-Mail: [susanne.birnkammer@fu-berlin.de](mailto:susanne.birnkammer@fu-berlin.de)

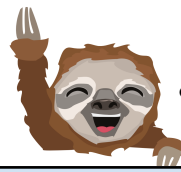

& Action, Datum: \_\_\_\_\_  
Dein Code: \_\_\_\_\_

## I. Einleitung Post- Testung der Kinder

### → Gesprächsbeginn:

Hallo,

wir hoffen, euch hat unser Projekt gefallen! Nachdem ihr nun in der Welt von Mondori unterwegs gewesen seid, möchten wir euch noch einmal ein paar Fragen dazu stellen. Falls ihr eine Frage nicht versteht, dann sprecht das gerne an und wir helfen euch gerne weiter!

Viel Spaß bei der Beantwortung der Fragen!

Euer Team von & Action!

## II. Angaben zum Wohlbefinden

→ Bevor wir mit dem eigentlichen Interview beginnen, haben wir noch einige Fragen zu deinem Wohlbefinden. ....

**Frage 1: Wie fühlst du dich jetzt, nachdem du Mondori ausprobieren konntest? Kannst du dabei Gefühle benennen?**

|  |
|--|
|  |
|  |
|  |

## III. Angaben zur App

→ Nachdem wir jetzt erfahren haben wie du dich fühlst, möchten wir dir noch paar Fragen zur App stellen. Ist das für dich in Ordnung?

**Frage 2: Fandest du das Design der App altersgemäß/ansprechend für dein Alter?**

|  |
|--|
|  |
|  |

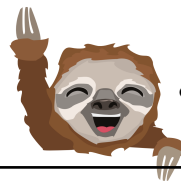

& Action, Datum: \_\_\_\_\_  
Dein Code: \_\_\_\_\_

|  |
|--|
|  |
|--|

**Frage 3: Nenne uns 3 Dinge, die dir an der App besonders gut gefallen haben?**

|  |
|--|
|  |
|  |
|  |

**Frage 4: Nenne uns 3 Dinge, die dir an der App überhaupt nicht gefallen haben?**

|  |
|--|
|  |
|  |
|  |

**Frage 5: Wie hat dir das Design von Mondori gefallen? Vergebe eine Schulnote. Bitte ankreuzen.**

*Bewertungshinweis 1-6*

|   |   |
|---|---|
| a | 1 |
| b | 2 |
| c | 3 |
| d | 4 |
| e | 5 |
| f | 6 |

**Frage 6: Würdest du die App Mondori gerne weiter verwenden? Bitte ankreuzen.**

|   |                                                  |
|---|--------------------------------------------------|
| a | Ja, ich möchte Mondori gerne weiterhin benutzen! |
| b | Nein, ich möchte Mondori nicht mehr benutzen!    |



& Action, Datum: \_\_\_\_\_  
Dein Code: \_\_\_\_\_

**Frage 7: Würdest du die App Mondori deinen Bekannten weiterempfehlen? Bitte ankreuzen.**

- |   |                                                        |
|---|--------------------------------------------------------|
| a | Ja, ich werde die Mondori App weiterempfehlen!         |
| b | Nein, ich werde die Mondori App nicht weiterempfehlen! |

**Frage 8: Wenn nein, warum möchtest du Mondori nicht mehr benutzen? Bitte ankreuzen.**

- |   |                                 |
|---|---------------------------------|
| a | Langweilig                      |
| b | Kein Interesse                  |
| c | Zu wenig Input (Inseln)         |
| d | Kein Grund                      |
| e | Kein Mobiltelefon zur Verfügung |
| f | Keine Zeit                      |

**IV. Angaben zum Projekt**

**Frage 9: Welche Aktivität des Projekts in der Einrichtung hat dir besonders gut gefallen? Falls du dich nicht entscheiden kannst, kannst du auch mehrere ankreuzen.**

- |  |         |
|--|---------|
|  | Theater |
|  | Natur   |
|  | Kunst   |
|  | Yoga    |

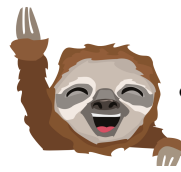

& Action, Datum: \_\_\_\_\_  
Dein Code: \_\_\_\_\_

**Frage 10: Was fandest du im Projekt interessanter - die gemeinsamen Übungen oder die App? Bitte ankreuzen.**

|                          |               |
|--------------------------|---------------|
| <input type="checkbox"/> | Aktivitäten   |
| <input type="checkbox"/> | App           |
| <input type="checkbox"/> | beides gleich |

**Frage 11: Hättest du dir eine längere Laufzeit des Projektes (App mit 12 Inseln, mehrere Wochen mit gemeinsamen Übungen) gewünscht? Bitte ankreuzen.**

|                          |                                               |
|--------------------------|-----------------------------------------------|
| <input type="checkbox"/> | Ja                                            |
| <input type="checkbox"/> | Nein                                          |
| <input type="checkbox"/> | Vielleicht, wenn folgendes anders wäre: _____ |

**Frage 12: Was hat dir insgesamt am Projekt am besten gefallen?**

|  |
|--|
|  |
|  |
|  |

V.      Gesprächsabschluss

→ Damit wären wir am Ende unseres Interviews. Wir bedanken uns herzlichst für die Beantwortung der Fragen und dass du Mondori ausgetestet hast! Wir hoffen, es hat dir gefallen! Wir freuen uns, wenn du Mondori auch in der Zukunft weiterhin verwendest! Ihr Team von &Action!
